# Supplementary material for: Comparative Pan-Genome Analysis of Oral Veillonella Species
Source: MDPI journal article supplement (doi:10.3390/microorganisms9081775), 2021-08-20
Supplement: s1 [file s1]

| No. | gene       | type   | cluster | genome | genomic_accession | start  | end    |
|-----|------------|--------|---------|--------|-------------------|--------|--------|
| 1   | PQL18695.1 | unique | 2777    | 1      | PPDE01000001.1    | 33371  | 33601  |
| 2   | PQL18659.1 | unique | 2865    | 1      | PPDE01000002.1    | 46853  | 47041  |
| 3   | PQL18387.1 | unique | 1113    | 1      | PPDE01000003.1    | 26816  | 27775  |
| 4   | PQL18389.1 | unique | 1365    | 1      | PPDE01000003.1    | 28247  | 29080  |
| 5   | PQL18630.1 | unique | 2193    | 1      | PPDE01000003.1    | 292731 | 293189 |
| 6   | PQL18640.1 | unique | 2428    | 1      | PPDE01000003.1    | 292244 | 292624 |
| 7   | PQL18335.1 | unique | 1953    | 1      | PPDE01000004.1    | 1477   | 2046   |
| 8   | PQL18360.1 | unique | 862     | 1      | PPDE01000004.1    | 25369  | 26484  |
| 9   | PQL18237.1 | unique | 1284    | 1      | PPDE01000005.1    | 49118  | 49993  |
| 10  | PQL18238.1 | unique | 455     | 1      | PPDE01000005.1    | 50187  | 51620  |
| 11  | PQL18328.1 | unique | 2853    | 1      | PPDE01000005.1    | 143875 | 144069 |
| 12  | PQL18116.1 | unique | 1800    | 1      | PPDE01000006.1    | 5837   | 6463   |
| 13  | PQL18117.1 | unique | 1922    | 1      | PPDE01000006.1    | 6378   | 6953   |
| 14  | PQL18119.1 | unique | 1992    | 1      | PPDE01000006.1    | 7339   | 7890   |
| 15  | PQL18120.1 | unique | 2565    | 1      | PPDE01000006.1    | 9187   | 9510   |
| 16  | PQL18121.1 | unique | 1539    | 1      | PPDE01000006.1    | 9539   | 10294  |
| 17  | PQL18122.1 | unique | 2384    | 1      | PPDE01000006.1    | 10296  | 10691  |
| 18  | PQL18123.1 | unique | 35      | 1      | PPDE01000006.1    | 10688  | 14758  |
| 19  | PQL18124.1 | unique | 2559    | 1      | PPDE01000006.1    | 14762  | 15088  |
| 20  | PQL18125.1 | unique | 1847    | 1      | PPDE01000006.1    | 15072  | 15677  |
| 21  | PQL18126.1 | unique | 2539    | 1      | PPDE01000006.1    | 15679  | 16011  |
| 22  | PQL18127.1 | unique | 60      | 1      | PPDE01000006.1    | 16014  | 19226  |
| 23  | PQL18128.1 | unique | 2595    | 1      | PPDE01000006.1    | 19216  | 19527  |
| 24  | PQL18129.1 | unique | 2663    | 1      | PPDE01000006.1    | 19545  | 19826  |
| 25  | PQL18130.1 | unique | 2168    | 1      | PPDE01000006.1    | 20805  | 21275  |
| 26  | PQL18131.1 | unique | 1689    | 1      | PPDE01000006.1    | 21278  | 21955  |
| 27  | PQL18132.1 | unique | 2620    | 1      | PPDE01000006.1    | 21952  | 22251  |
| 28  | PQL18133.1 | unique | 2541    | 1      | PPDE01000006.1    | 22316  | 22648  |
| 29  | PQL18134.1 | unique | 230     | 1      | PPDE01000006.1    | 22666  | 24567  |
| 30  | PQL18135.1 | unique | 403     | 1      | PPDE01000006.1    | 24570  | 26072  |
| 31  | PQL18136.1 | unique | 2811    | 1      | PPDE01000006.1    | 26057  | 26269  |
| 32  | PQL18137.1 | unique | 217     | 1      | PPDE01000006.1    | 26281  | 28218  |
| 33  | PQL18138.1 | unique | 2067    | 1      | PPDE01000006.1    | 28148  | 28657  |
| 34  | PQL18139.1 | unique | 2373    | 1      | PPDE01000006.1    | 29037  | 29438  |
| 35  | PQL18140.1 | unique | 2614    | 1      | PPDE01000006.1    | 29469  | 29771  |
| 36  | PQL18142.1 | unique | 2625    | 1      | PPDE01000006.1    | 32048  | 32347  |
| 37  | PQL18143.1 | unique | 102     | 1      | PPDE01000006.1    | 32663  | 35128  |
| 38  | PQL18144.1 | unique | 211     | 1      | PPDE01000006.1    | 35145  | 37112  |
| 39  | PQL18145.1 | unique | 1795    | 1      | PPDE01000006.1    | 37125  | 37751  |

|    |            |        |      |   |                |        |        |
|----|------------|--------|------|---|----------------|--------|--------|
| 40 | PQL18146.1 | unique | 791  | 1 | PPDE01000006.1 | 37754  | 38917  |
| 41 | PQL18147.1 | unique | 2261 | 1 | PPDE01000006.1 | 38917  | 39354  |
| 42 | PQL18148.1 | unique | 2698 | 1 | PPDE01000006.1 | 39380  | 39643  |
| 43 | PQL18149.1 | unique | 2731 | 1 | PPDE01000006.1 | 39649  | 39900  |
| 44 | PQL18151.1 | unique | 1852 | 1 | PPDE01000006.1 | 41356  | 41958  |
| 45 | PQL18152.1 | unique | 2154 | 1 | PPDE01000006.1 | 42046  | 42519  |
| 46 | PQL18153.1 | unique | 2870 | 1 | PPDE01000006.1 | 42516  | 42701  |
| 47 | PQL18154.1 | unique | 2778 | 1 | PPDE01000006.1 | 42685  | 42915  |
| 48 | PQL18157.1 | unique | 2372 | 1 | PPDE01000006.1 | 44199  | 44600  |
| 49 | PQL18194.1 | unique | 2795 | 1 | PPDE01000006.1 | 29775  | 29996  |
| 50 | PQL17450.1 | unique | 2845 | 1 | PPDE01000008.1 | 84653  | 84850  |
| 51 | PQL17528.1 | unique | 311  | 1 | PPDE01000008.1 | 172780 | 174471 |
| 52 | PQL17529.1 | unique | 147  | 1 | PPDE01000008.1 | 174473 | 176680 |
| 53 | PQL17530.1 | unique | 611  | 1 | PPDE01000008.1 | 176682 | 177968 |
| 54 | PQL17531.1 | unique | 96   | 1 | PPDE01000008.1 | 177961 | 180477 |
| 55 | PQL17532.1 | unique | 1673 | 1 | PPDE01000008.1 | 180527 | 181213 |
| 56 | PQL20889.1 | unique | 1192 | 2 | PPDB01000001.1 | 45245  | 46174  |
| 57 | PQL20890.1 | unique | 1058 | 2 | PPDB01000001.1 | 46266  | 47258  |
| 58 | PQL20918.1 | unique | 2075 | 2 | PPDB01000001.1 | 75051  | 75557  |
| 59 | PQL20929.1 | unique | 890  | 2 | PPDB01000001.1 | 87883  | 88974  |
| 60 | PQL20970.1 | unique | 489  | 2 | PPDB01000001.1 | 139835 | 141223 |
| 61 | PQL20972.1 | unique | 260  | 2 | PPDB01000001.1 | 142347 | 144170 |
| 62 | PQL20973.1 | unique | 2166 | 2 | PPDB01000001.1 | 144170 | 144640 |
| 63 | PQL20974.1 | unique | 446  | 2 | PPDB01000001.1 | 145053 | 146492 |
| 64 | PQL21017.1 | unique | 2824 | 2 | PPDB01000001.1 | 204408 | 204614 |
| 65 | PQL21018.1 | unique | 1484 | 2 | PPDB01000001.1 | 204904 | 205680 |
| 66 | PQL21019.1 | unique | 2876 | 2 | PPDB01000001.1 | 205837 | 206019 |
| 67 | PQL21021.1 | unique | 2786 | 2 | PPDB01000001.1 | 206251 | 206475 |
| 68 | PQL21030.1 | unique | 2199 | 2 | PPDB01000001.1 | 211080 | 211538 |
| 69 | PQL21034.1 | unique | 1861 | 2 | PPDB01000001.1 | 213070 | 213669 |
| 70 | PQL21035.1 | unique | 277  | 2 | PPDB01000001.1 | 213666 | 215414 |
| 71 | PQL21058.1 | unique | 1951 | 2 | PPDB01000001.1 | 235344 | 235913 |
| 72 | PQL21059.1 | unique | 2229 | 2 | PPDB01000001.1 | 235903 | 236352 |
| 73 | PQL21236.1 | unique | 939  | 2 | PPDB01000001.1 | 146544 | 147596 |
| 74 | PQL20246.1 | unique | 2602 | 2 | PPDB01000003.1 | 353305 | 353613 |
| 75 | PQL20306.1 | unique | 1174 | 2 | PPDB01000003.1 | 421300 | 422235 |
| 76 | PQL20308.1 | unique | 1097 | 2 | PPDB01000003.1 | 423888 | 424859 |
| 77 | PQL20346.1 | unique | 528  | 2 | PPDB01000003.1 | 468897 | 470249 |
| 78 | PQL20349.1 | unique | 1767 | 2 | PPDB01000003.1 | 474711 | 475349 |
| 79 | PQL20379.1 | unique | 2131 | 2 | PPDB01000003.1 | 507260 | 507745 |

|     |                |        |      |   |                |         |         |
|-----|----------------|--------|------|---|----------------|---------|---------|
| 80  | PQL20416.1     | unique | 2299 | 2 | PPDB01000003.1 | 557344  | 557769  |
| 81  | PQL20417.1     | unique | 918  | 2 | PPDB01000003.1 | 557879  | 558949  |
| 82  | PQL20448.1     | unique | 563  | 2 | PPDB01000003.1 | 555534  | 556862  |
| 83  | WP_005385388.1 | unique | 1366 | 3 | NZ_GG667604.1  | 453962  | 454792  |
| 84  | WP_005385391.1 | unique | 2830 | 3 | NZ_GG667604.1  | 456295  | 456498  |
| 85  | WP_005385394.1 | unique | 2769 | 3 | NZ_GG667604.1  | 456843  | 457076  |
| 86  | WP_005385396.1 | unique | 2799 | 3 | NZ_GG667604.1  | 457128  | 457346  |
| 87  | WP_005385397.1 | unique | 2887 | 3 | NZ_GG667604.1  | 457339  | 457518  |
| 88  | WP_005385398.1 | unique | 2916 | 3 | NZ_GG667604.1  | 457536  | 457685  |
| 89  | WP_005385399.1 | unique | 2524 | 3 | NZ_GG667604.1  | 457660  | 458001  |
| 90  | WP_005385633.1 | unique | 2079 | 3 | NZ_GG667604.1  | 607192  | 607695  |
| 91  | WP_005385878.1 | unique | 2852 | 3 | NZ_GG667604.1  | 741688  | 741882  |
| 92  | WP_005386155.1 | unique | 701  | 3 | NZ_GG667604.1  | 916330  | 917553  |
| 93  | WP_005386157.1 | unique | 292  | 3 | NZ_GG667604.1  | 920920  | 922650  |
| 94  | WP_005386158.1 | unique | 272  | 3 | NZ_GG667604.1  | 922647  | 924404  |
| 95  | WP_005386167.1 | unique | 543  | 3 | NZ_GG667604.1  | 932709  | 934052  |
| 96  | WP_005386412.1 | unique | 1519 | 3 | NZ_GG667604.1  | 1103541 | 1104305 |
| 97  | WP_005386421.1 | unique | 2408 | 3 | NZ_GG667604.1  | 1104932 | 1105321 |
| 98  | WP_005386536.1 | unique | 2831 | 3 | NZ_GG667604.1  | 1168880 | 1169083 |
| 99  | WP_005387372.1 | unique | 2581 | 3 | NZ_GG667605.1  | 147829  | 148146  |
| 100 | WP_005387487.1 | unique | 2182 | 3 | NZ_GG667605.1  | 204821  | 205285  |
| 101 | WP_005387951.1 | unique | 2727 | 3 | NZ_GG667605.1  | 496336  | 496587  |
| 102 | WP_005387954.1 | unique | 2268 | 3 | NZ_GG667605.1  | 496601  | 497035  |
| 103 | BBU33667.1     | unique | 2874 | 4 | AP022321.1     | 154942  | 155127  |
| 104 | BBU33684.1     | unique | 2735 | 4 | AP022321.1     | 175139  | 175387  |
| 105 | BBU33687.1     | unique | 2926 | 4 | AP022321.1     | 176471  | 176596  |
| 106 | BBU33733.1     | unique | 2816 | 4 | AP022321.1     | 228830  | 229039  |
| 107 | BBU33734.1     | unique | 430  | 4 | AP022321.1     | 229036  | 230496  |
| 108 | BBU33736.1     | unique | 2626 | 4 | AP022321.1     | 231027  | 231323  |
| 109 | BBU33738.1     | unique | 836  | 4 | AP022321.1     | 231602  | 232732  |
| 110 | BBU33842.1     | unique | 558  | 4 | AP022321.1     | 345807  | 347138  |
| 111 | BBU33877.1     | unique | 2928 | 4 | AP022321.1     | 379226  | 379345  |
| 112 | BBU33988.1     | unique | 1289 | 4 | AP022321.1     | 488202  | 489074  |
| 113 | BBU33990.1     | unique | 2907 | 4 | AP022321.1     | 489674  | 489835  |
| 114 | BBU34219.1     | unique | 40   | 4 | AP022321.1     | 762673  | 766407  |
| 115 | BBU34402.1     | unique | 2914 | 4 | AP022321.1     | 968270  | 968419  |
| 116 | BBU34408.1     | unique | 2900 | 4 | AP022321.1     | 972027  | 972197  |
| 117 | BBU34410.1     | unique | 2310 | 4 | AP022321.1     | 972713  | 973135  |
| 118 | BBU35076.1     | unique | 2891 | 4 | AP022321.1     | 1681262 | 1681441 |
| 119 | BBU35285.1     | unique | 2785 | 4 | AP022321.1     | 1901025 | 1901249 |

|     |                |        |      |   |                |         |         |
|-----|----------------|--------|------|---|----------------|---------|---------|
| 120 | BBU35286.1     | unique | 2026 | 4 | AP022321.1     | 1901348 | 1901884 |
| 121 | BBU35287.1     | unique | 2635 | 4 | AP022321.1     | 1902048 | 1902341 |
| 122 | BBU35288.1     | unique | 2298 | 4 | AP022321.1     | 1902464 | 1902889 |
| 123 | BBU35289.1     | unique | 2632 | 4 | AP022321.1     | 1902904 | 1903200 |
| 124 | BBU35296.1     | unique | 2898 | 4 | AP022321.1     | 1906946 | 1907116 |
| 125 | BBU35298.1     | unique | 2904 | 4 | AP022321.1     | 1907877 | 1908041 |
| 126 | BBU35309.1     | unique | 1936 | 4 | AP022321.1     | 1919941 | 1920513 |
| 127 | BBU35364.1     | unique | 63   | 4 | AP022321.1     | 1972677 | 1975871 |
| 128 | BBU35429.1     | unique | 2755 | 4 | AP022321.1     | 2045538 | 2045777 |
| 129 | WP_004698366.1 | unique | 2787 | 5 | NC_013520.1    | 471969  | 472193  |
| 130 | WP_012863636.1 | unique | 348  | 5 | NC_013520.1    | 30084   | 31694   |
| 131 | WP_012863642.1 | unique | 400  | 5 | NC_013520.1    | 36098   | 37606   |
| 132 | WP_012863755.1 | unique | 2158 | 5 | NC_013520.1    | 224086  | 224559  |
| 133 | WP_012863780.1 | unique | 153  | 5 | NC_013520.1    | 253192  | 255378  |
| 134 | WP_012863781.1 | unique | 821  | 5 | NC_013520.1    | 255371  | 256513  |
| 135 | WP_012863782.1 | unique | 635  | 5 | NC_013520.1    | 256541  | 257812  |
| 136 | WP_012863783.1 | unique | 780  | 5 | NC_013520.1    | 257842  | 259014  |
| 137 | WP_012863789.1 | unique | 904  | 5 | NC_013520.1    | 262494  | 263576  |
| 138 | WP_012863840.1 | unique | 2817 | 5 | NC_013520.1    | 341725  | 341934  |
| 139 | WP_012863944.1 | unique | 2788 | 5 | NC_013520.1    | 471570  | 471794  |
| 140 | WP_012863992.1 | unique | 406  | 5 | NC_013520.1    | 523510  | 525000  |
| 141 | WP_012863994.1 | unique | 719  | 5 | NC_013520.1    | 526093  | 527304  |
| 142 | WP_012863995.1 | unique | 91   | 5 | NC_013520.1    | 527273  | 529858  |
| 143 | WP_012863996.1 | unique | 224  | 5 | NC_013520.1    | 529865  | 531781  |
| 144 | WP_012863997.1 | unique | 2630 | 5 | NC_013520.1    | 531786  | 532082  |
| 145 | WP_012863998.1 | unique | 2886 | 5 | NC_013520.1    | 532564  | 532743  |
| 146 | WP_012864001.1 | unique | 71   | 5 | NC_013520.1    | 535745  | 538699  |
| 147 | WP_012865018.1 | unique | 195  | 5 | NC_013520.1    | 2083918 | 2085933 |
| 148 | WP_012865019.1 | unique | 169  | 5 | NC_013520.1    | 2085997 | 2088141 |
| 149 | WP_021148019.1 | unique | 2742 | 5 | NC_013520.1    | 864863  | 865108  |
| 150 | WP_042466885.1 | unique | 902  | 5 | NC_013520.1    | 524993  | 526075  |
| 151 | WP_052293367.1 | unique | 212  | 5 | NC_013520.1    | 533782  | 535743  |
| 152 | WP_071840061.1 | unique | 2879 | 5 | NC_013520.1    | 829204  | 829386  |
| 153 | WP_080513040.1 | unique | 2896 | 5 | NC_013520.1    | 865211  | 865384  |
| 154 | PQL15935.1     | unique | 2833 | 6 | PPCX01000001.1 | 1       | 206     |
| 155 | PQL15936.1     | unique | 2708 | 6 | PPCX01000001.1 | 434     | 694     |
| 156 | PQL15937.1     | unique | 2269 | 6 | PPCX01000001.1 | 816     | 1250    |
| 157 | PQL15939.1     | unique | 2598 | 6 | PPCX01000001.1 | 1925    | 2236    |
| 158 | PQL15941.1     | unique | 2260 | 6 | PPCX01000001.1 | 2812    | 3249    |
| 159 | PQL15943.1     | unique | 2143 | 6 | PPCX01000001.1 | 3482    | 3958    |

|     |                |        |      |   |                   |        |        |
|-----|----------------|--------|------|---|-------------------|--------|--------|
| 160 | PQL15944.1     | unique | 2580 | 6 | PPCX01000001.1    | 4029   | 4346   |
| 161 | PQL15949.1     | unique | 2768 | 6 | PPCX01000001.1    | 8151   | 8384   |
| 162 | PQL15951.1     | unique | 1924 | 6 | PPCX01000001.1    | 9918   | 10493  |
| 163 | PQL15956.1     | unique | 2359 | 6 | PPCX01000001.1    | 14811  | 15215  |
| 164 | PQL15957.1     | unique | 2327 | 6 | PPCX01000001.1    | 15739  | 16155  |
| 165 | PQL15958.1     | unique | 2849 | 6 | PPCX01000001.1    | 16986  | 17180  |
| 166 | PQL15959.1     | unique | 2719 | 6 | PPCX01000001.1    | 17195  | 17452  |
| 167 | PQL15960.1     | unique | 2230 | 6 | PPCX01000001.1    | 17500  | 17949  |
| 168 | PQL15967.1     | unique | 1684 | 6 | PPCX01000001.1    | 21882  | 22565  |
| 169 | PQL15035.1     | unique | 1894 | 6 | PPCX01000002.1    | 35067  | 35654  |
| 170 | PQL15037.1     | unique | 2858 | 6 | PPCX01000002.1    | 36301  | 36492  |
| 171 | PQL14590.1     | unique | 910  | 6 | PPCX01000003.1    | 26261  | 27337  |
| 172 | PQL14591.1     | unique | 2205 | 6 | PPCX01000003.1    | 27406  | 27861  |
| 173 | PQL12797.1     | unique | 1805 | 6 | PPCX01000008.1    | 37935  | 38558  |
| 174 | PQL12798.1     | unique | 235  | 6 | PPCX01000008.1    | 38568  | 40460  |
| 175 | PQL12800.1     | unique | 790  | 6 | PPCX01000008.1    | 42280  | 43443  |
| 176 | PQL12801.1     | unique | 1672 | 6 | PPCX01000008.1    | 43486  | 44172  |
| 177 | PQL12210.1     | unique | 126  | 6 | PPCX01000010.1    | 410908 | 413220 |
| 178 | PQL12277.1     | unique | 1026 | 6 | PPCX01000010.1    | 493791 | 494795 |
| 179 | PQL11621.1     | unique | 2167 | 6 | PPCX01000011.1    | 82715  | 83185  |
| 180 | PQL58287.1     | unique | 2076 | 7 | PPDD01000005.1    | 18196  | 18702  |
| 181 | PQL57722.1     | unique | 1204 | 7 | PPDD01000009.1    | 30374  | 31297  |
| 182 | PQL57723.1     | unique | 65   | 7 | PPDD01000009.1    | 31303  | 34467  |
| 183 | PQL57724.1     | unique | 50   | 7 | PPDD01000009.1    | 34471  | 37929  |
| 184 | PQL57725.1     | unique | 1114 | 7 | PPDD01000009.1    | 37934  | 38893  |
| 185 | PQL57726.1     | unique | 2068 | 7 | PPDD01000009.1    | 38950  | 39459  |
| 186 | PQL57727.1     | unique | 1621 | 7 | PPDD01000009.1    | 39468  | 40184  |
| 187 | PQL57728.1     | unique | 2270 | 7 | PPDD01000009.1    | 40205  | 40639  |
| 188 | PQL57729.1     | unique | 173  | 7 | PPDD01000009.1    | 40741  | 42840  |
| 189 | PQL57602.1     | unique | 447  | 7 | PPDD01000010.1    | 136913 | 138352 |
| 190 | PQL57259.1     | unique | 1293 | 7 | PPDD01000012.1    | 9690   | 10559  |
| 191 | PQL57088.1     | unique | 1999 | 7 | PPDD01000015.1    | 32864  | 33409  |
| 192 | PQL57106.1     | unique | 234  | 7 | PPDD01000015.1    | 57671  | 59563  |
| 193 | WP_059361140.1 | unique | 2746 | 8 | NZ_BBXI01000002.1 | 75110  | 75352  |
| 194 | WP_059361161.1 | unique | 41   | 8 | NZ_BBXI01000002.1 | 84264  | 87965  |
| 195 | WP_059361164.1 | unique | 1542 | 8 | NZ_BBXI01000002.1 | 88000  | 88755  |
| 196 | WP_059361240.1 | unique | 2868 | 8 | NZ_BBXI01000002.1 | 128765 | 128953 |
| 197 | WP_059361413.1 | unique | 2834 | 8 | NZ_BBXI01000002.1 | 218248 | 218448 |
| 198 | WP_059361510.1 | unique | 2209 | 8 | NZ_BBXI01000003.1 | 41368  | 41823  |
| 199 | WP_059361626.1 | unique | 1362 | 8 | NZ_BBXI01000003.1 | 169491 | 170324 |

|     |                |        |      |   |                   |        |        |
|-----|----------------|--------|------|---|-------------------|--------|--------|
| 200 | WP_036754116.1 | unique | 2810 | 8 | NZ_BBXI01000009.1 | 187244 | 187456 |
| 201 | WP_059361902.1 | unique | 2836 | 8 | NZ_BBXI01000009.1 | 109413 | 109613 |
| 202 | WP_059361910.1 | unique | 2792 | 8 | NZ_BBXI01000009.1 | 113435 | 113656 |
| 203 | WP_059361962.1 | unique | 1739 | 8 | NZ_BBXI01000009.1 | 174607 | 175260 |
| 204 | WP_059361963.1 | unique | 187  | 8 | NZ_BBXI01000009.1 | 175260 | 177302 |
| 205 | WP_059361970.1 | unique | 267  | 8 | NZ_BBXI01000009.1 | 182852 | 184645 |
| 206 | WP_059361978.1 | unique | 983  | 8 | NZ_BBXI01000009.1 | 187477 | 188505 |
| 207 | WP_059361979.1 | unique | 313  | 8 | NZ_BBXI01000009.1 | 188505 | 190187 |
| 208 | WP_059361993.1 | unique | 2132 | 8 | NZ_BBXI01000009.1 | 196257 | 196739 |
| 209 | WP_059362058.1 | unique | 1937 | 8 | NZ_BBXI01000009.1 | 231538 | 232110 |
| 210 | WP_059362060.1 | unique | 329  | 8 | NZ_BBXI01000009.1 | 232111 | 233757 |
| 211 | WP_059362067.1 | unique | 104  | 8 | NZ_BBXI01000009.1 | 238898 | 241354 |
| 212 | WP_059362069.1 | unique | 835  | 8 | NZ_BBXI01000009.1 | 241363 | 242493 |
| 213 | WP_059364321.1 | unique | 1869 | 8 | NZ_BBXI01000021.1 | 138095 | 138691 |
| 214 | WP_059364548.1 | unique | 1973 | 8 | NZ_BBXI01000022.1 | 19947  | 20507  |
| 215 | WP_059364576.1 | unique | 1011 | 8 | NZ_BBXI01000022.1 | 39578  | 40591  |
| 216 | WP_059364587.1 | unique | 1241 | 8 | NZ_BBXI01000026.1 | 1404   | 2303   |
