# Supplementary material for: Comparative Pan-Genome Analysis of Oral Veillonella Species
Source: MDPI journal article supplement (doi:10.3390/microorganisms9081775), 2021-08-20
Supplement: s1 [file s1]

| MAJOR_KEGG_CATEGORY                  | KEGG SUB-CATEGORY                   | KEGG PATHWAY                                                          | CORE | ACCESSORY | UNIQUE |
|--------------------------------------|-------------------------------------|-----------------------------------------------------------------------|------|-----------|--------|
| Cellular_Processes                   | Cell_growth_and_death               | 04112 Cell cycle - Caulobacter [PATH:ko04112]                         | 9    | 0         | 0      |
|                                      | Cell_motility                       | 02030 Bacterial chemotaxis [PATH:ko02030]                             | 1    | 0         | 0      |
|                                      | Cellular_community                  | 04510 Focal adhesion [PATH:ko04510]                                   | 0    | 0         | 3      |
|                                      |                                     | 04146 Peroxisome [PATH:ko04146]                                       | 1    | 3         | 0      |
| Environmental_Information_Processing | Membrane_transport                  | 02010 ABC transporters [PATH:ko02010]                                 | 58   | 22        | 6      |
|                                      |                                     | 02060 Phosphotransferase system (PTS) [PATH:ko02060]                  | 5    | 0         | 0      |
|                                      |                                     | 03070 Bacterial secretion system [PATH:ko03070]                       | 12   | 2         | 1      |
|                                      | Signal_transduction                 | 02020 Two-component system [PATH:ko02020]                             | 17   | 6         | 2      |
|                                      |                                     | 04011 MAPK signaling pathway - yeast [PATH:ko04011]                   | 1    | 0         | 0      |
|                                      |                                     | 04066 HIF-1 signaling pathway [PATH:ko04066]                          | 2    | 0         | 0      |
|                                      |                                     | 04068 FoxO signaling pathway [PATH:ko04068]                           | 0    | 2         | 0      |
|                                      |                                     | 04070 Phosphatidylinositol signaling system [PATH:ko04070]            | 1    | 0         | 0      |
|                                      |                                     | 04151 PI3K-Akt signaling pathway [PATH:ko04151]                       | 0    | 0         | 3      |
|                                      |                                     | 04152 AMPK signaling pathway [PATH:ko04152]                           | 0    | 1         | 0      |
|                                      |                                     |                                                                       |      |           |        |
|                                      | Signaling_molecules_and_interaction | 04512 ECM-receptor interaction [PATH:ko04512]                         | 0    | 1         | 3      |
| Genetic_Information_Processing       | Folding_sorting_and_degradation     | 03018 RNA degradation [PATH:ko03018]                                  | 12   | 1         | 0      |
|                                      |                                     | 03060 Protein export [PATH:ko03060]                                   | 13   | 0         | 0      |
|                                      |                                     | 04122 Sulfur relay system [PATH:ko04122]                              | 4    | 0         | 2      |
|                                      | Replication_and_repair              | 03030 DNA replication [PATH:ko03030]                                  | 13   | 0         | 0      |
|                                      |                                     | 03410 Base excision repair [PATH:ko03410]                             | 8    | 0         | 0      |
|                                      |                                     | 03420 Nucleotide excision repair [PATH:ko03420]                       | 8    | 0         | 1      |
|                                      |                                     | 03430 Mismatch repair [PATH:ko03430]                                  | 16   | 0         | 1      |
|                                      |                                     | 03440 Homologous recombination [PATH:ko03440]                         | 18   | 1         | 1      |
|                                      |                                     |                                                                       |      |           |        |
|                                      | Transcription                       | 03020 RNA polymerase [PATH:ko03020]                                   | 4    | 0         | 0      |
|                                      | Translation                         | 00970 Aminoacyl-tRNA biosynthesis [PATH:ko00970]                      | 26   | 0         | 0      |
|                                      |                                     | 03008 Ribosome biogenesis in eukaryotes [PATH:ko03008]                | 1    | 0         | 0      |
|                                      |                                     | 03010 Ribosome [PATH:ko03010]                                         | 51   | 1         | 0      |
| Human_Diseases                       | Cancers                             | 05200 Pathways in cancer [PATH:ko05200]                               | 1    | 0         | 1      |
|                                      |                                     | 05203 Viral carcinogenesis [PATH:ko05203]                             | 1    | 0         | 0      |
|                                      |                                     | 05205 Proteoglycans in cancer [PATH:ko05205]                          | 1    | 0         | 0      |
|                                      |                                     | 05206 MicroRNAs in cancer [PATH:ko05206]                              | 1    | 1         | 6      |
|                                      |                                     | 05211 Renal cell carcinoma [PATH:ko05211]                             | 1    | 0         | 0      |
|                                      |                                     | 05230 Central carbon metabolism in cancer [PATH:ko05230]              | 1    | 1         | 0      |
|                                      | Drug_resistance                     | 01501 beta-Lactam resistance [PATH:ko01501]                           | 10   | 3         | 0      |
|                                      |                                     | 01502 Vancomycin resistance [PATH:ko01502]                            | 5    | 0         | 0      |
|                                      |                                     | 01503 Cationic antimicrobial peptide (CAMP) resistance [PATH:ko01503] | 6    | 1         | 0      |

|            |                                             |                                                                                 |    |   |   |
|------------|---------------------------------------------|---------------------------------------------------------------------------------|----|---|---|
|            | Endocrine_and_metabolic_diseases            | 04930 Type II diabetes mellitus [PATH:ko04930]                                  | 1  | 0 | 0 |
|            |                                             | 04940 Type I diabetes mellitus [PATH:ko04940]                                   | 1  | 0 | 0 |
|            |                                             | 05111 Vibrio cholerae pathogenic cycle [PATH:ko05111]                           | 0  | 1 | 0 |
|            |                                             | 05120 Epithelial cell signaling in Helicobacter pylori infection [PATH:ko05120] | 2  | 0 | 0 |
|            |                                             | 05132 Salmonella infection [PATH:ko05132]                                       | 1  | 0 | 0 |
|            |                                             | 05133 Pertussis [PATH:ko05133]                                                  | 0  | 1 | 2 |
|            |                                             | 05134 Legionellosis [PATH:ko05134]                                              | 2  | 0 | 0 |
|            |                                             | 05146 Amoebiasis [PATH:ko05146]                                                 | 0  | 0 | 3 |
|            |                                             | 05152 Tuberculosis [PATH:ko05152]                                               | 2  | 1 | 0 |
|            | Neurodegenerative_diseases                  | 05010 Alzheimer's disease [PATH:ko05010]                                        | 1  | 0 | 0 |
|            |                                             | 05014 Amyotrophic lateral sclerosis (ALS) [PATH:ko05014]                        | 0  | 1 | 0 |
|            |                                             | 05016 Huntington's disease [PATH:ko05016]                                       | 0  | 1 | 0 |
| Metabolism | Amino_acid_metabolism                       | 00250 Alanine, aspartate and glutamate metabolism [PATH:ko00250]                | 14 | 2 | 0 |
|            |                                             | 00260 Glycine, serine and threonine metabolism [PATH:ko00260]                   | 16 | 0 | 0 |
|            |                                             | 00270 Cysteine and methionine metabolism [PATH:ko00270]                         | 25 | 1 | 6 |
|            |                                             | 00280 Valine, leucine and isoleucine degradation [PATH:ko00280]                 | 7  | 1 | 0 |
|            |                                             | 00290 Valine, leucine and isoleucine biosynthesis [PATH:ko00290]                | 10 | 2 | 0 |
|            |                                             | 00300 Lysine biosynthesis [PATH:ko00300]                                        | 12 | 0 | 0 |
|            |                                             | 00310 Lysine degradation [PATH:ko00310]                                         | 2  | 1 | 0 |
|            |                                             | 00330 Arginine and proline metabolism [PATH:ko00330]                            | 12 | 6 | 0 |
|            |                                             | 00340 Histidine metabolism [PATH:ko00340]                                       | 1  | 9 | 0 |
|            |                                             | 00350 Tyrosine metabolism [PATH:ko00350]                                        | 2  | 2 | 1 |
|            |                                             | 00360 Phenylalanine metabolism [PATH:ko00360]                                   | 4  | 1 | 0 |
|            |                                             | 00380 Tryptophan metabolism [PATH:ko00380]                                      | 0  | 2 | 0 |
|            |                                             | 00400 Phenylalanine, tyrosine and tryptophan biosynthesis [PATH:ko00400]        | 18 | 2 | 0 |
|            | Biosynthesis_of_other_secondary_metabolites | 00261 Monobactam biosynthesis [PATH:ko00261]                                    | 4  | 0 | 0 |
|            |                                             | 00311 Penicillin and cephalosporin biosynthesis [PATH:ko00311]                  | 1  | 0 | 0 |
|            |                                             | 00332 Carbapenem biosynthesis [PATH:ko00332]                                    | 2  | 0 | 0 |
|            |                                             | 00401 Novobiocin biosynthesis [PATH:ko00401]                                    | 1  | 2 | 0 |
|            |                                             | 00521 Streptomycin biosynthesis [PATH:ko00521]                                  | 1  | 0 | 4 |
|            |                                             | 00950 Isoquinoline alkaloid biosynthesis [PATH:ko00950]                         | 2  | 0 | 0 |
|            |                                             | 00960 Tropane, piperidine and pyridine alkaloid biosynthesis [PATH:ko00960]     | 3  | 1 | 0 |
|            | Carbohydrate_metabolism                     | 00010 Glycolysis / Gluconeogenesis [PATH:ko00010]                               | 13 | 3 | 1 |
|            |                                             | 00020 Citrate cycle (TCA cycle) [PATH:ko00020]                                  | 10 | 0 | 1 |
|            |                                             | 00030 Pentose phosphate pathway [PATH:ko00030]                                  | 15 | 2 | 0 |
|            |                                             | 00040 Pentose and glucuronate interconversions [PATH:ko00040]                   | 3  | 0 | 0 |
|            |                                             | 00051 Fructose and mannose metabolism [PATH:ko00051]                            | 6  | 1 | 0 |

|  |                                      |                                                                          |    |   |   |
|--|--------------------------------------|--------------------------------------------------------------------------|----|---|---|
|  |                                      | 00052 Galactose metabolism [PATH:ko00052]                                | 4  | 2 | 0 |
|  |                                      | 00053 Ascorbate and aldarate metabolism [PATH:ko00053]                   | 4  | 0 | 0 |
|  |                                      | 00500 Starch and sucrose metabolism [PATH:ko00500]                       | 3  | 1 | 0 |
|  |                                      | 00520 Amino sugar and nucleotide sugar metabolism [PATH:ko00520]         | 11 | 5 | 0 |
|  |                                      | 00562 Inositol phosphate metabolism [PATH:ko00562]                       | 1  | 0 | 0 |
|  |                                      | 00620 Pyruvate metabolism [PATH:ko00620]                                 | 20 | 4 | 4 |
|  |                                      | 00630 Glyoxylate and dicarboxylate metabolism [PATH:ko00630]             | 14 | 3 | 1 |
|  |                                      | 00640 Propanoate metabolism [PATH:ko00640]                               | 13 | 1 | 1 |
|  |                                      | 00650 Butanoate metabolism [PATH:ko00650]                                | 6  | 4 | 2 |
|  |                                      | 00660 C5-Branched dibasic acid metabolism [PATH:ko00660]                 | 5  | 2 | 0 |
|  | Energy_metabolism                    | 00190 Oxidative phosphorylation [PATH:ko00190]                           | 15 | 0 | 0 |
|  |                                      | 00195 Photosynthesis [PATH:ko00195]                                      | 8  | 0 | 0 |
|  |                                      | 00680 Methane metabolism [PATH:ko00680]                                  | 12 | 1 | 0 |
|  |                                      | 00710 Carbon fixation in photosynthetic organisms [PATH:ko00710]         | 9  | 0 | 0 |
|  |                                      | 00720 Carbon fixation pathways in prokaryotes [PATH:ko00720]             | 23 | 1 | 1 |
|  |                                      | 00910 Nitrogen metabolism [PATH:ko00910]                                 | 12 | 5 | 0 |
|  |                                      | 00920 Sulfur metabolism [PATH:ko00920]                                   | 6  | 0 | 0 |
|  | Glycan_biosynthesis_and_metabolism   | 00510 N-Glycan biosynthesis [PATH:ko00510]                               | 1  | 0 | 0 |
|  |                                      | 00531 Glycosaminoglycan degradation [PATH:ko00531]                       | 0  | 3 | 0 |
|  |                                      | 00540 Lipopolysaccharide biosynthesis [PATH:ko00540]                     | 17 | 0 | 1 |
|  |                                      | 00550 Peptidoglycan biosynthesis [PATH:ko00550]                          | 12 | 0 | 3 |
|  | Lipid_metabolism                     | 00061 Fatty acid biosynthesis [PATH:ko00061]                             | 7  | 1 | 0 |
|  |                                      | 00071 Fatty acid degradation [PATH:ko00071]                              | 0  | 3 | 1 |
|  |                                      | 00072 Synthesis and degradation of ketone bodies [PATH:ko00072]          | 0  | 1 | 0 |
|  |                                      | 00561 Glycerolipid metabolism [PATH:ko00561]                             | 6  | 0 | 0 |
|  |                                      | 00564 Glycerophospholipid metabolism [PATH:ko00564]                      | 8  | 0 | 1 |
|  |                                      | 00565 Ether lipid metabolism [PATH:ko00565]                              | 0  | 0 | 0 |
|  |                                      | 00590 Arachidonic acid metabolism [PATH:ko00590]                         | 0  | 1 | 0 |
|  |                                      | 01040 Biosynthesis of unsaturated fatty acids [PATH:ko01040]             | 1  | 0 | 0 |
|  | Metabolism_of_cofactors_and_vitamins | 00130 Ubiquinone and other terpenoid-quinone biosynthesis [PATH:ko00130] | 8  | 1 | 0 |
|  |                                      | 00670 One carbon pool by folate [PATH:ko00670]                           | 10 | 0 | 0 |
|  |                                      | 00730 Thiamine metabolism [PATH:ko00730]                                 | 4  | 3 | 4 |
|  |                                      | 00740 Riboflavin metabolism [PATH:ko00740]                               | 5  | 0 | 0 |
|  |                                      | 00750 Vitamin B6 metabolism [PATH:ko00750]                               | 2  | 0 | 0 |
|  |                                      | 00760 Nicotinate and nicotinamide metabolism [PATH:ko00760]              | 6  | 0 | 0 |
|  |                                      | 00770 Pantothenate and CoA biosynthesis [PATH:ko00770]                   | 10 | 5 | 0 |
|  |                                      | 00780 Biotin metabolism [PATH:ko00780]                                   | 10 | 0 | 0 |

|                    |                                           |                                                                              |    |    |   |
|--------------------|-------------------------------------------|------------------------------------------------------------------------------|----|----|---|
|                    |                                           | 00790 Folate biosynthesis [PATH:ko00790]                                     | 10 | 3  | 0 |
|                    |                                           | 00860 Porphyrin and chlorophyll metabolism [PATH:ko00860]                    | 36 | 6  | 0 |
|                    | Metabolism_of_other_amino_acids           | 00410 beta-Alanine metabolism [PATH:ko00410]                                 | 1  | 3  | 0 |
|                    |                                           | 00430 Taurine and hypotaurine metabolism [PATH:ko00430]                      | 3  | 0  | 0 |
|                    |                                           | 00440 Phosphonate and phosphinate metabolism [PATH:ko00440]                  | 1  | 1  | 0 |
|                    |                                           | 00450 Selenocompound metabolism [PATH:ko00450]                               | 8  | 1  | 0 |
|                    |                                           | 00460 Cyanoamino acid metabolism [PATH:ko00460]                              | 2  | 0  | 0 |
|                    |                                           | 00471 D-Glutamine and D-glutamate metabolism [PATH:ko00471]                  | 3  | 0  | 0 |
|                    |                                           | 00472 D-Arginine and D-ornithine metabolism [PATH:ko00472]                   | 1  | 0  | 0 |
|                    |                                           | 00473 D-Alanine metabolism [PATH:ko00473]                                    | 3  | 0  | 0 |
|                    |                                           | 00480 Glutathione metabolism [PATH:ko00480]                                  | 2  | 2  | 0 |
|                    | Metabolism_of_terpenoids_and_polyketides  | 00523 Polyketide sugar unit biosynthesis [PATH:ko00523]                      | 0  | 0  | 4 |
|                    |                                           | 00900 Terpenoid backbone biosynthesis [PATH:ko00900]                         | 9  | 4  | 0 |
|                    |                                           | 00908 Zeatin biosynthesis [PATH:ko00908]                                     | 1  | 0  | 0 |
|                    |                                           | 01051 Biosynthesis of ansamycins [PATH:ko01051]                              | 2  | 0  | 0 |
|                    |                                           | 01053 Biosynthesis of siderophore group nonribosomal peptides [PATH:ko01053] | 1  | 0  | 0 |
|                    |                                           | 01055 Biosynthesis of vancomycin group antibiotics [PATH:ko01055]            | 0  | 0  | 1 |
|                    | Nucleotide_metabolism                     | 00230 Purine metabolism [PATH:ko00230]                                       | 45 | 5  | 0 |
|                    |                                           | 00240 Pyrimidine metabolism [PATH:ko00240]                                   | 34 | 3  | 1 |
|                    | Overview                                  | 01200 Carbon metabolism [PATH:ko01200]                                       | 48 | 5  | 1 |
|                    |                                           | 01210 2-Oxocarboxylic acid metabolism [PATH:ko01210]                         | 14 | 5  | 1 |
|                    |                                           | 01212 Fatty acid metabolism [PATH:ko01212]                                   | 7  | 2  | 0 |
|                    |                                           | 01220 Degradation of aromatic compounds [PATH:ko01220]                       | 2  | 2  | 1 |
|                    |                                           | 01230 Biosynthesis of amino acids [PATH:ko01230]                             | 75 | 17 | 1 |
|                    | Xenobiotics_biodegradation_and_metabolism | 00362 Benzoate degradation [PATH:ko00362]                                    | 2  | 2  | 0 |
|                    |                                           | 00621 Dioxin degradation [PATH:ko00621]                                      | 1  | 0  | 0 |
|                    |                                           | 00622 Xylene degradation [PATH:ko00622]                                      | 1  | 0  | 0 |
|                    |                                           | 00625 Chloroalkane and chloroalkene degradation [PATH:ko00625]               | 0  | 1  | 1 |
|                    |                                           | 00626 Naphthalene degradation [PATH:ko00626]                                 | 0  | 1  | 1 |
|                    |                                           | 00627 Aminobenzoate degradation [PATH:ko00627]                               | 0  | 1  | 0 |
|                    |                                           | 00633 Nitrotoluene degradation [PATH:ko00633]                                | 4  | 0  | 0 |
|                    |                                           | 00983 Drug metabolism - other enzymes [PATH:ko00983]                         | 4  | 1  | 0 |
| Organismal_Systems | Digestive_system                          | 04974 Protein digestion and absorption [PATH:ko04974]                        | 0  | 0  | 3 |
|                    |                                           | 04976 Bile secretion [PATH:ko04976]                                          | 1  | 0  | 0 |
|                    | Endocrine_system                          | 03320 PPAR signaling pathway [PATH:ko03320]                                  | 0  | 1  | 0 |
|                    |                                           | 04918 Thyroid hormone synthesis [PATH:ko04918]                               | 0  | 1  | 0 |
|                    |                                           | 04920 Adipocytokine signaling pathway [PATH:ko04920]                         | 0  | 1  | 0 |

|  |                |                                                 |   |   |   |
|--|----------------|-------------------------------------------------|---|---|---|
|  |                | 04922 Glucagon signaling pathway [PATH:ko04922] | 2 | 0 | 0 |
|  | Immune_system  | 04611 Platelet activation [PATH:ko04611]        | 0 | 0 | 2 |
|  | Nervous_system | 04724 Glutamatergic synapse [PATH:ko04724]      | 1 | 0 | 0 |
|  |                | 04727 GABAergic synapse [PATH:ko04727]          | 1 | 0 | 0 |
